# Supplementary material
Source: publisher site journal article supplement (https://www.dovepress.com/article/505707)
Supplement: Supplementary file 1 [file get_supplementary_file.php]

**Supplementary Table 1 Pre- and Post-operative VAS scores**

| **Case no.** | **Pre-OP** | **1 day**  **Post-OP** | **1 week**  **Post-OP** | **1 month**  **Post-OP** | **3 months**  **Post-OP** | **Final**  **follow-up** |
| --- | --- | --- | --- | --- | --- | --- |
| 1 | 9 | 4 | 3 | 2 | 1 | 1 |
| 2 | 8 | 5 | 3 | 2 | 1 | 1 |
| 3 | 10 | 3 | 2 | 2 | 0 | 0 |
| 4 | 7 | 3 | 2 | 2 | 1 | 1 |
| 5 | 9 | 5 | 4 | 4 | 4 | 4 |
| 6 | 7 | 2 | 2 | 1 | 0 | 0 |
| 7 | 9 | 6 | 3 | 2 | 1 | 1 |
| 8 | 8 | 4 | 3 | 2 | 1 | 1 |
| 9 | 5 | 2 | 2 | 2 | 1 | 0 |
| 10 | 9 | 4 | 3 | 2 | 1 | 1 |
| 11 | 9 | 3 | 2 | 2 | 1 | 1 |
| 12 | 9 | 3 | 2 | 2 | 0 | 0 |
| 13 | 10 | 7 | 2 | 2 | 1 | 1 |
| 14 | 8 | 7 | 5 | 4 | 3 | 3 |
| 15 | 6 | 2 | 2 | 2 | 1 | 1 |
| 16 | 10 | 3 | 3 | 2 | 1 | 1 |

**Supplementary Table 2 Pre- and Post-operative C-reactive protein (CRP) values**

| **Case no.** | **Pre-OP** | **1 day**  **Post-OP** | **1 week**  **Post-OP** | **1 month**  **Post-OP** | **3 months**  **Post-OP** | **Final**  **follow-up** |
| --- | --- | --- | --- | --- | --- | --- |
| 1 | 25 | 42 | 7 | 3 | 3 | 5 |
| 2 | 97 | 106 | 65 | 33 | 3 | 7 |
| 3 | 35 | 43 | 15 | 5 | 6 | 7 |
| 4 | 60 | 77 | 44 | 16 | 11 | 5 |
| 5 | 182 | 219 | 101 | 8 | 5 | 6 |
| 6 | 239 | 236 | 143 | 27 | 17 | 4 |
| 7 | 147 | 163 | 96 | 16 | 6 | 10 |
| 8 | 48 | 69 | 35 | 6 | 4 | 7 |
| 9 | 49 | 79 | 21 | 3 | 4 | 9 |
| 10 | 65 | 90 | 37 | 7 | 5 | 4 |
| 11 | 32 | 43 | 8 | 6 | 6 | 7 |
| 12 | 129 | 137 | 74 | 21 | 8 | 4 |
| 13 | 48 | 56 | 15 | 2 | 4 | 6 |
| 14 | 79 | 90 | 53 | 46 | 11 | 5 |
| 15 | 96 | 113 | 47 | 4 | 5 | 7 |
| 16 | 165 | 178 | 83 | 42 | 15 | 8 |

**Supplementary Table 3 Pre- and Post-operative erythrocyte sedimentation rate (ESR) values**

| **Case no.** | **Pre-OP** | **1 day**  **Post-OP** | **1 week**  **Post-OP** | **1 month**  **Post-OP** | **3 months**  **Post-OP** | **Final**  **follow-up** |
| --- | --- | --- | --- | --- | --- | --- |
| 1 | 46 | 48 | 39 | 22 | 9 | 12 |
| 2 | 38 | 40 | 30 | 21 | 4 | 4 |
| 3 | 60 | 57 | 47 | 36 | 21 | 5 |
| 4 | 77 | 69 | 61 | 35 | 16 | 8 |
| 5 | 129 | 140 | 113 | 71 | 37 | 9 |
| 6 | 125 | 156 | 101 | 74 | 25 | 11 |
| 7 | 57 | 65 | 46 | 31 | 15 | 4 |
| 8 | 57 | 84 | 41 | 30 | 18 | 8 |
| 9 | 95 | 77 | 64 | 42 | 11 | 17 |
| 10 | 85 | 88 | 75 | 47 | 16 | 9 |
| 11 | 35 | 42 | 27 | 20 | 15 | 11 |
| 12 | 116 | 111 | 75 | 53 | 27 | 15 |
| 13 | 52 | 64 | 32 | 56 | 24 | 9 |
| 14 | 33 | 41 | 24 | 17 | 12 | 11 |
| 15 | 69 | 68 | 48 | 41 | 10 | 26 |
| 16 | 136 | 140 | 99 | 69 | 37 | 22 |

**Supplementary Table 4 Pre- and Post-operative white blood cells (WBC)**

| **Case no.** | **Pre-OP** | **1 day**  **Post-OP** | **1 week**  **Post-OP** | **1 month**  **Post-OP** | **3 months**  **Post-OP** | **Final**  **follow-up** |
| --- | --- | --- | --- | --- | --- | --- |
| 1 | 8.31 | 14.32 | 7.31 | 6.43 | 7.13 | 7.63 |
| 2 | 6.33 | 9.41 | 8.31 | 7.22 | 6.87 | 7.21 |
| 3 | 7.21 | 11.34 | 8.79 | 6.13 | 5.87 | 6.17 |
| 4 | 6.21 | 10.55 | 9.1 | 8.31 | 8.94 | 7.14 |
| 5 | 14.76 | 15.31 | 8.54 | 7.31 | 8.65 | 6.87 |
| 6 | 17.53 | 16.32 | 11.7 | 8.43 | 7.98 | 6.38 |
| 7 | 6.31 | 8.34 | 5.32 | 6.31 | 7.43 | 7.23 |
| 8 | 7.91 | 9.43 | 5.11 | 6.97 | 6.77 | 4.57 |
| 9 | 12.94 | 14.67 | 7.77 | 7.85 | 7.91 | 6.21 |
| 10 | 13.94 | 16.98 | 9.32 | 6.53 | 6.98 | 8.24 |
| 11 | 8.45 | 9.81 | 7.51 | 7.21 | 8.54 | 6.88 |
| 12 | 14.87 | 16.87 | 12.76 | 5.21 | 4.98 | 5.98 |
| 13 | 6.33 | 8.45 | 8.99 | 7.3 | 6.54 | 5.29 |
| 14 | 9.16 | 11.41 | 10.31 | 5.31 | 5.87 | 5.19 |
| 15 | 15.55 | 14.53 | 10.31 | 8.88 | 7.43 | 6.49 |
| 16 | 12.32 | 15.54 | 9.33 | 5.31 | 4.98 | 7.58 |
